# Supplementary material for: Control of Directed Cell Migration after Tubular Cell Injury by Nucleotide Signaling
Source: MDPI journal article supplement (doi:10.3390/ijms23147870), 2022-07-17

# Control of directed cell migration after tubular cell injury by nucleotide signaling

**Sabrina Gessler<sup>1+</sup>, Clara Guthmann<sup>1+</sup>, Vera Schuler<sup>1+</sup>, Miriam Lilienkamp<sup>1+</sup>, Gerd Walz<sup>1,2</sup> and Toma Antonov Yakulov<sup>1,\*</sup>**

<sup>1</sup> Renal Division, University Freiburg Medical Center, Faculty of Medicine, University of Freiburg, Hugstetter Strasse 55, 79106 Freiburg, Germany; sabrina.gessler@gmx.net (S.G.), clara@guthmann.eu (C.G.), miriam.lilienkamp@freenet.de (M.L.), vera.schuler@gmx.de (V.S.), gerd.walz@uniklinik-freiburg.de (G.W.), toma.antonov.yakulov@uniklinik-freiburg.de (T.A.Y.)

<sup>2</sup> Signaling Research Centres BIOSS and CIBSS, University of Freiburg, Albertstrasse 19, 79104 Freiburg, Germany; gerd.walz@uniklinik-freiburg.de (G.W.)

+ Equal contribution

\* Correspondence: toma.antonov.yakulov@uniklinik-freiburg.de

Figure S1

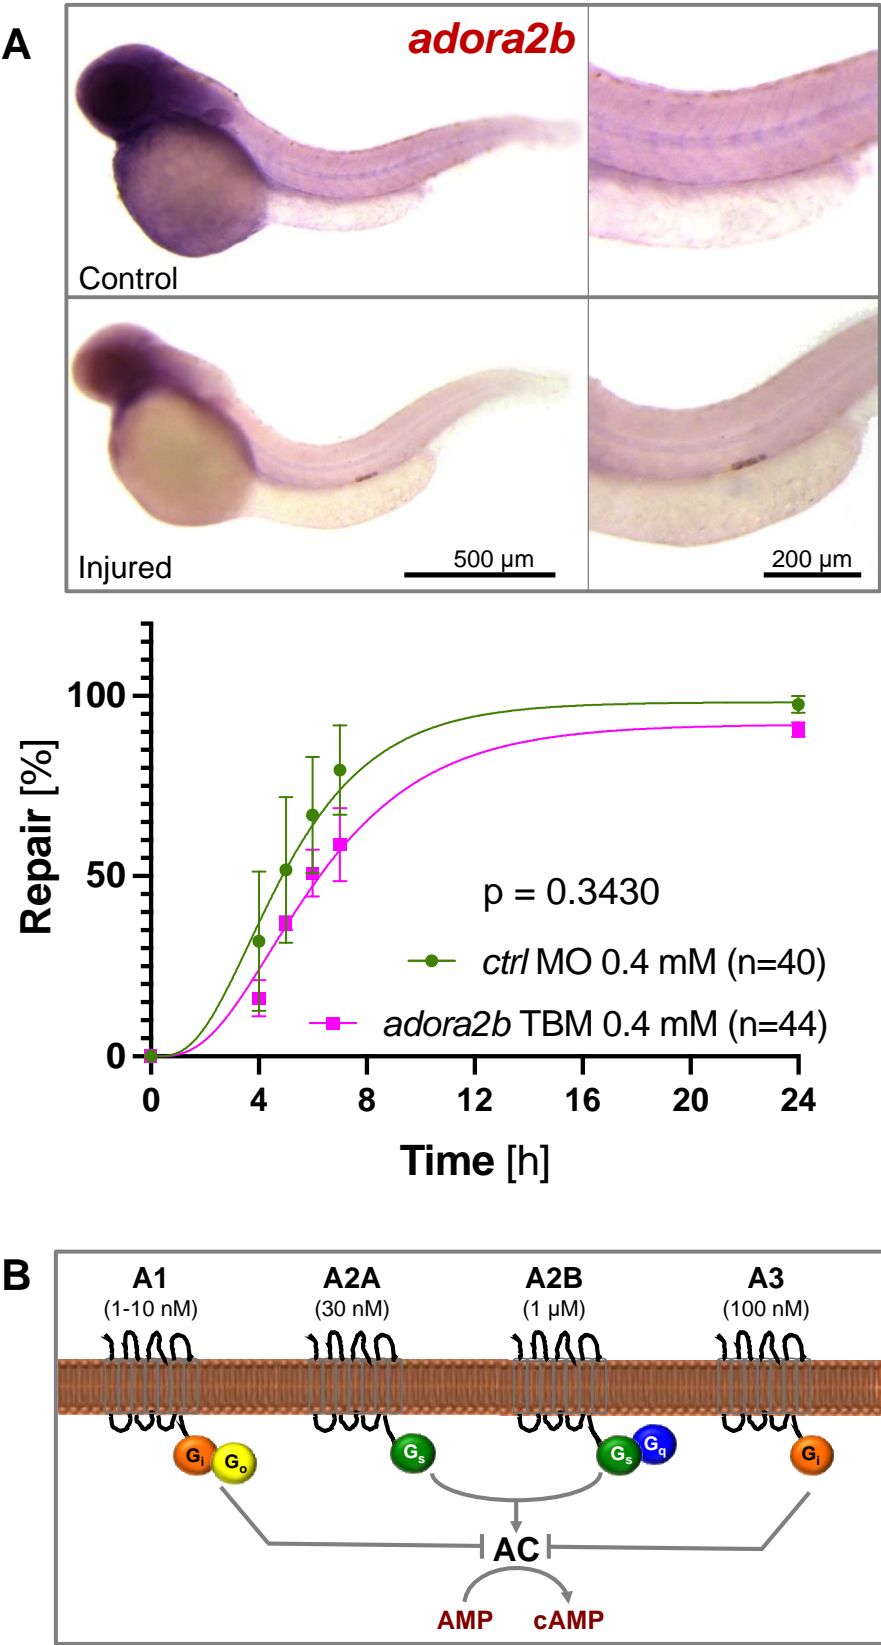

Figure S2

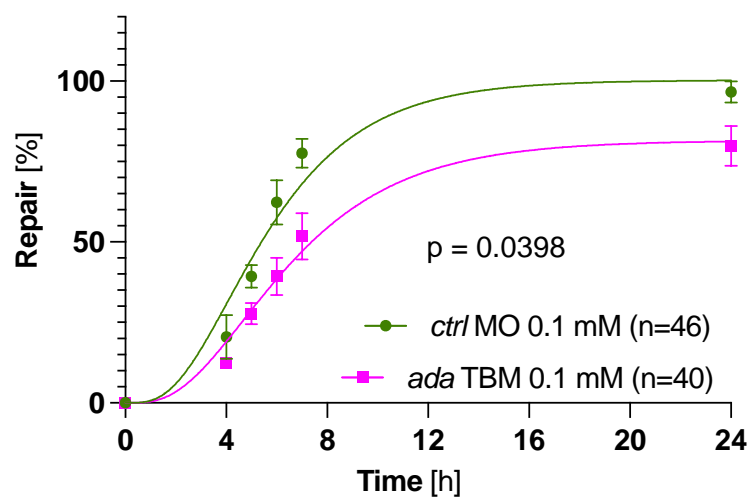

Figure S3

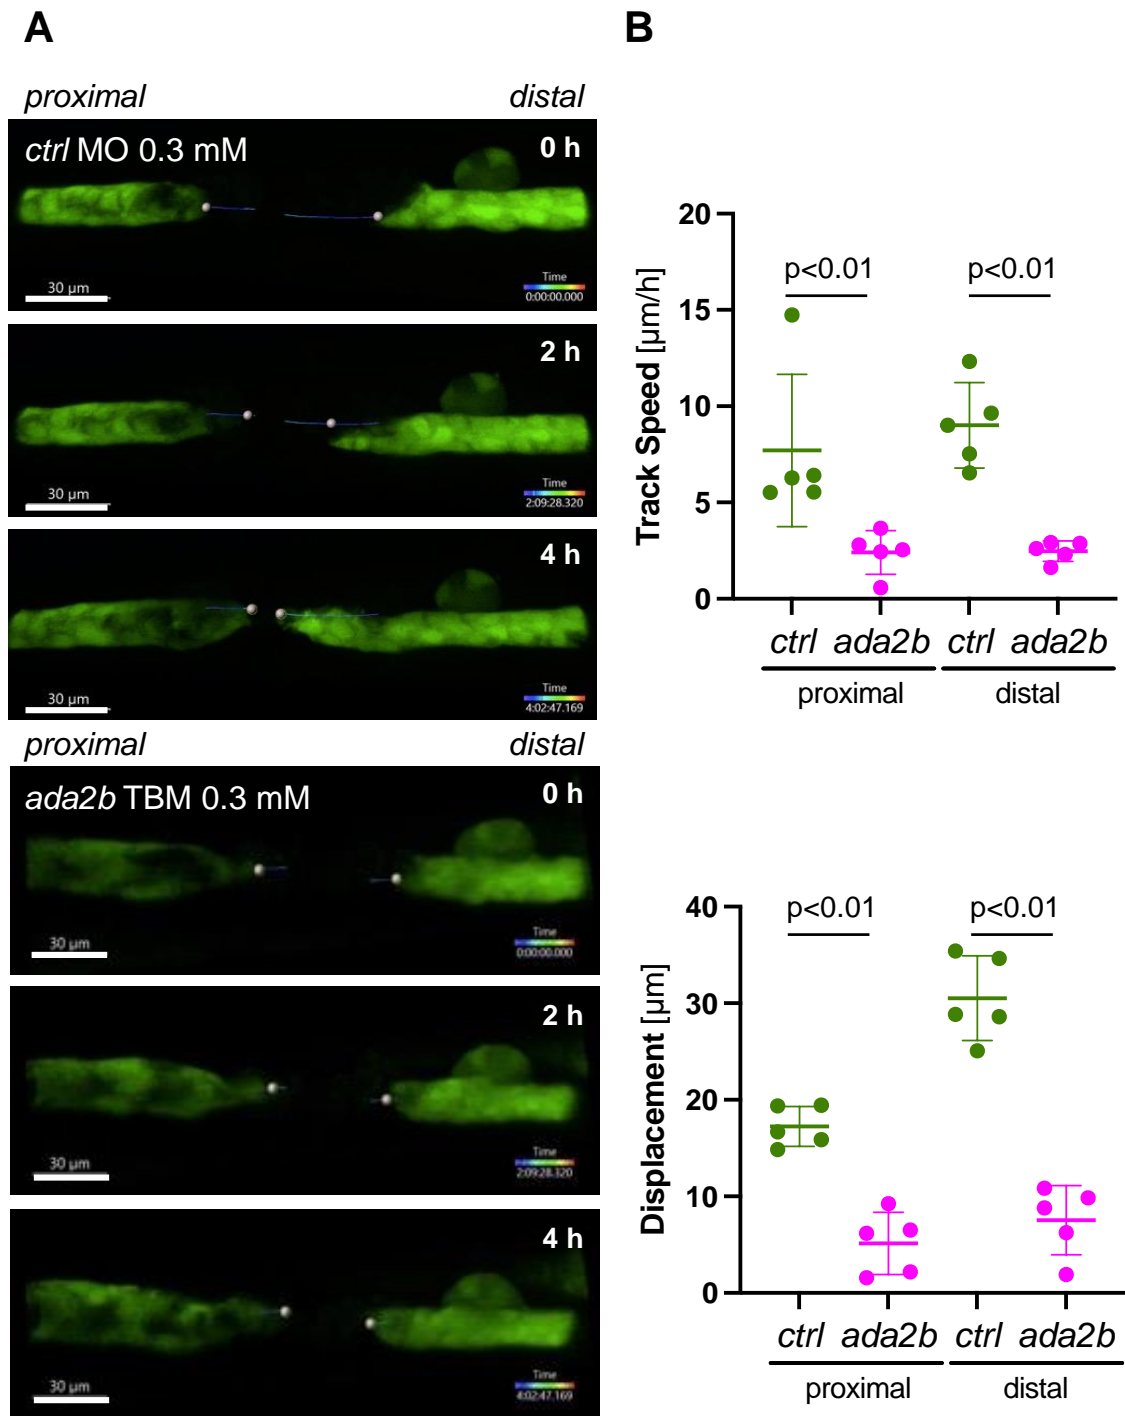

Figure S4

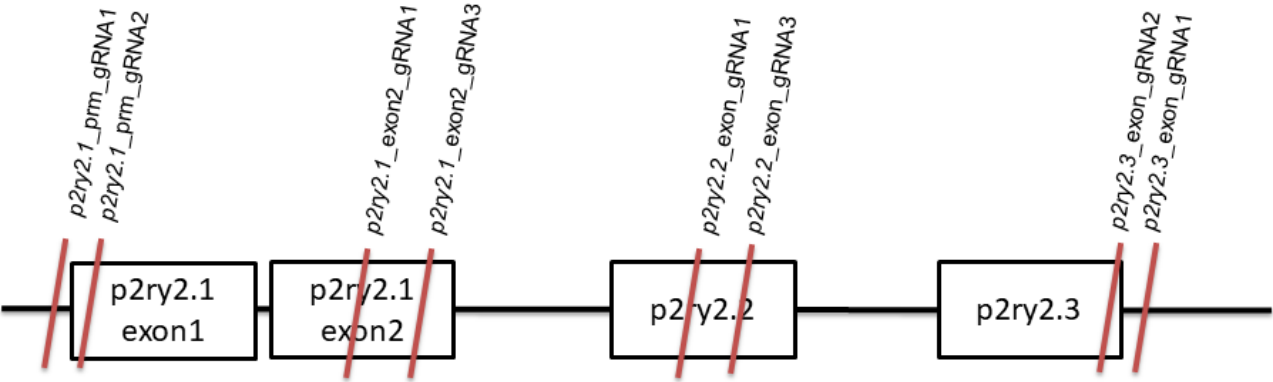

Figure S5

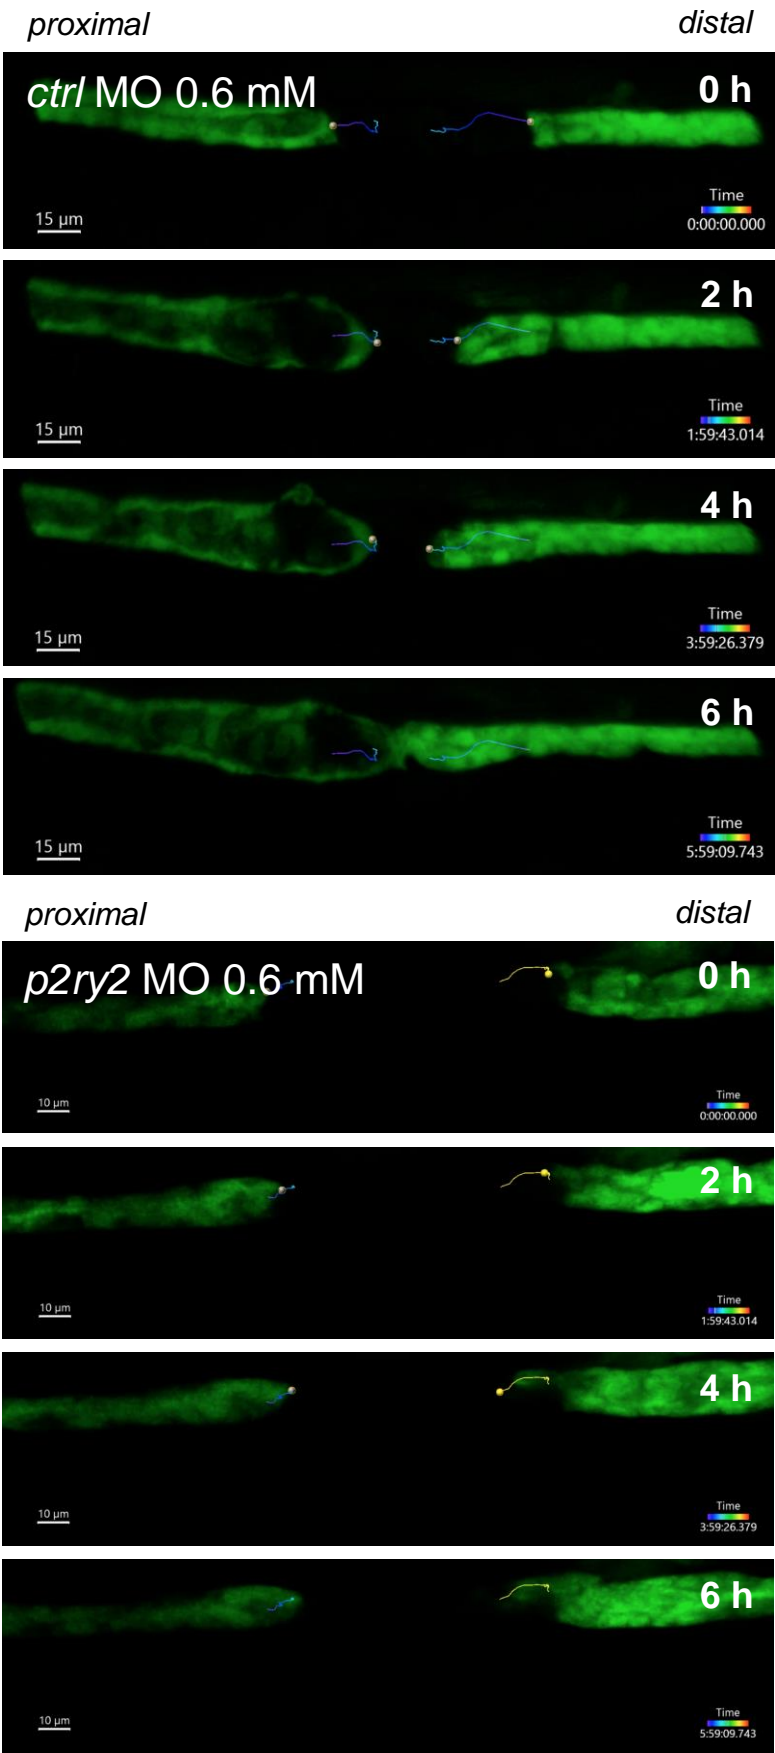

Supplement: s1 [file s1]
